# Supplementary material
Source: publisher figshare collection journal article supplement (https://gsajournals.figshare.com/articles/dataset/_/6631409)
Supplement: Supplementary file 1 [file 1]

**Table S1. Summary of the analysis result for high order LD scans.**

|        |                     | Raw data        |                     |                   |           | Filter one way r2 >0.6 |                     |                    |           |
|--------|---------------------|-----------------|---------------------|-------------------|-----------|------------------------|---------------------|--------------------|-----------|
|        |                     | cis-cis         | cis-trans           | trans-trans       | Total     | cis-cis                | cis-trans           | trans-trans        | Total     |
| Pair 1 | Num of calculations | 9.21e+10        | 2.64e+11            | 2.11e+11          | 5.68e+11  | 6.46e+10               | 1.84e+11            | 1.45e+11           | 3.94e+11  |
|        | Hits                |                 |                     |                   |           |                        |                     |                    |           |
|        | 100                 | 54236           | 75479               | 1938              | 131653    | 38358                  | 51809               | 1933               | 92100     |
| Pair 2 | 728                 | 38744           | 53654               | 81                | 92479     | 21680                  | 28457               | 26                 | 50163     |
|        | Num of calculations | 3.35e+10        | 1.40e+11            | 1.59e+11          | 3.33e+11  | 2.20e+10               | 9.35e+10            | 1.07e+11           | 2.23e+11  |
|        | Hits                |                 |                     |                   |           |                        |                     |                    |           |
| Pair 3 | 100                 | 52900           | 76209               | 1120              | 130229    | 39176                  | 48399               | 1120               | 88695     |
|        | 728                 | 31354           | 48345               | 2                 | 79701     | 18351                  | 24295               | 2                  | 42648     |
|        | Num of calculations | 3.35e+10        | 1.37e+11            | 1.52e+11          | 3.22e+11  | 2.20e+10               | 9.12e+10            | 1.02e+11           | 2.15e+11  |
| Total  | Hits                |                 |                     |                   |           |                        |                     |                    |           |
|        | 100                 | 48050           | 67786               | 415               | 116251    | 33309                  | 49782               | 0                  | 83091     |
|        | 728                 | 33309           | 49782               | 0                 | 83091     | 19609                  | 23290               | 0                  | 42899     |
| Genome | Num of calculation  | 1.592e+11       | 5.426e+11           | 5.227e+11         | 1.224e+12 | 1.088e+11              | 3.694e+11           | 3.555e+11          | 8.337e+11 |
|        | Hits                |                 |                     |                   |           |                        |                     |                    |           |
|        | 100 mean/sd.er      | 9677673/5317336 | 386500271/179449513 | 161921921/3943330 | /         | 9092135/5258931        | 325828262/154851233 | 167549625/16648189 | /         |
|        | 728 mean/sd.er      | 6315806/3310607 | 265911259/120350459 | 3390052/2592970   | /         | 4589735/2528037        | 162260386/71413958  | 1395341/924728     | /         |
