# Supplementary material
Source: publisher figshare collection journal article supplement (https://gsajournals.figshare.com/articles/dataset/_/6631409)
Supplement: Supplementary file 2 [file 1]

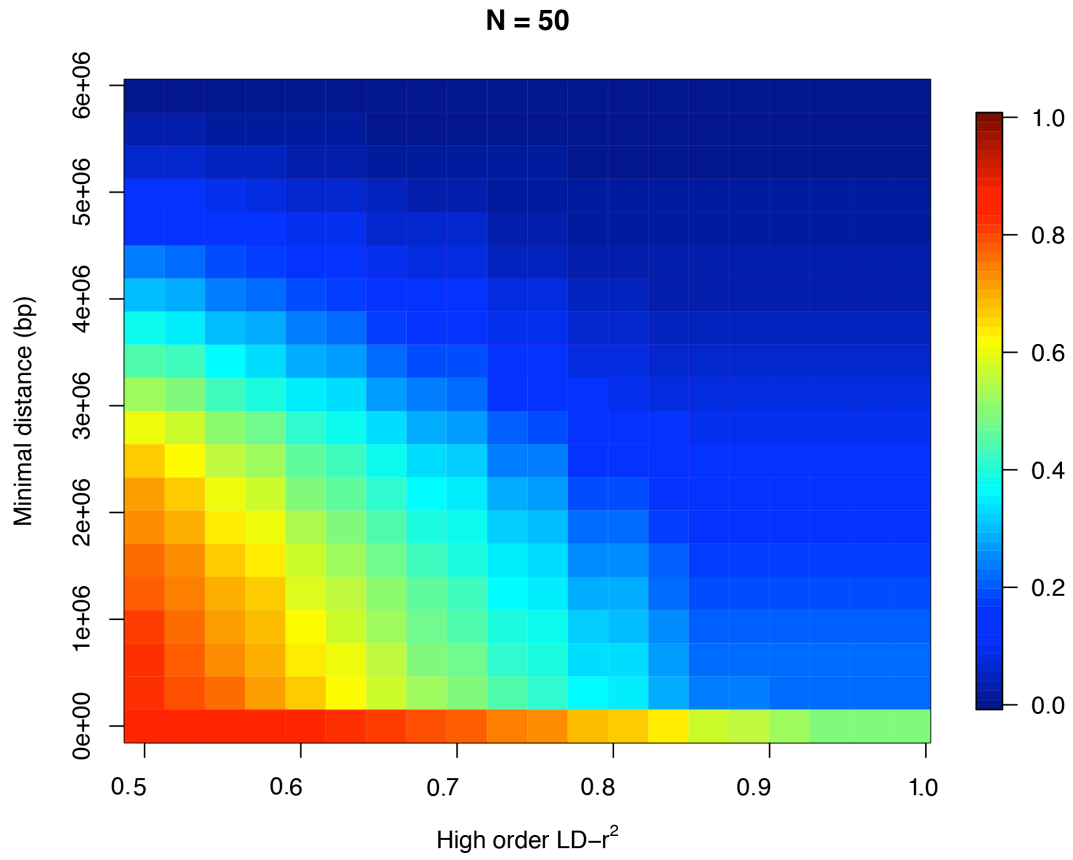

**Figure S1.** Illustration of how the prevalence of high order LD- $r^2$  to the targets in a 6Mb window on *A. thaliana* chromosome 2 (8 – 14Mb) depends on distance of the predictors from the target. The color gradient illustrates the proportion of predictor pairs that reach a particular LD- $r^2$  (x-axis) depending on the distance between the nearest predictor and the target (y-axis). Results are presented for populations with  $n = 50$  individuals.
